# Supplementary material for: A Metabolomic Signature of Ischemic Stroke Showing Acute Oxidative and Energetic Stress
Source: MDPI journal article supplement (doi:10.3390/antiox13010060), 2023-12-29
Supplement: s1 [file s1]

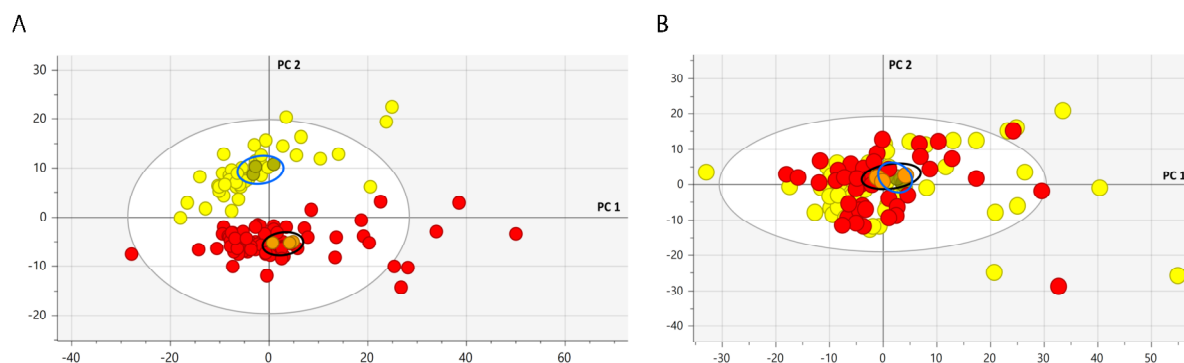

**Supplementary Figure S1:** Batch effect normalization. **A-**Without batch correction, a marked batch effect appeared in principal component analysis (PCA) with a neat discrimination between samples analyzed in the first batch/kit (yellow circles) and those analyzed in the second batch/kit (red circles). Pool samples (green and orange circles delimited by blue and black ellipses, respectively) seem also seem to represent samples on each batch very well. **B-** After batch correction, patient and pool samples no longer segregate according to the batch factor. No predictive supervised (OPLS-DA) model separating samples according to batch effect was found after normalization.
